# Supplementary figures and images for: Virus Discovery in Desert Tortoise Fecal Samples: Novel Circular Single-Stranded DNA Viruses
Source: MDPI journal article supplement (doi:10.3390/v12020143), 2020-01-26

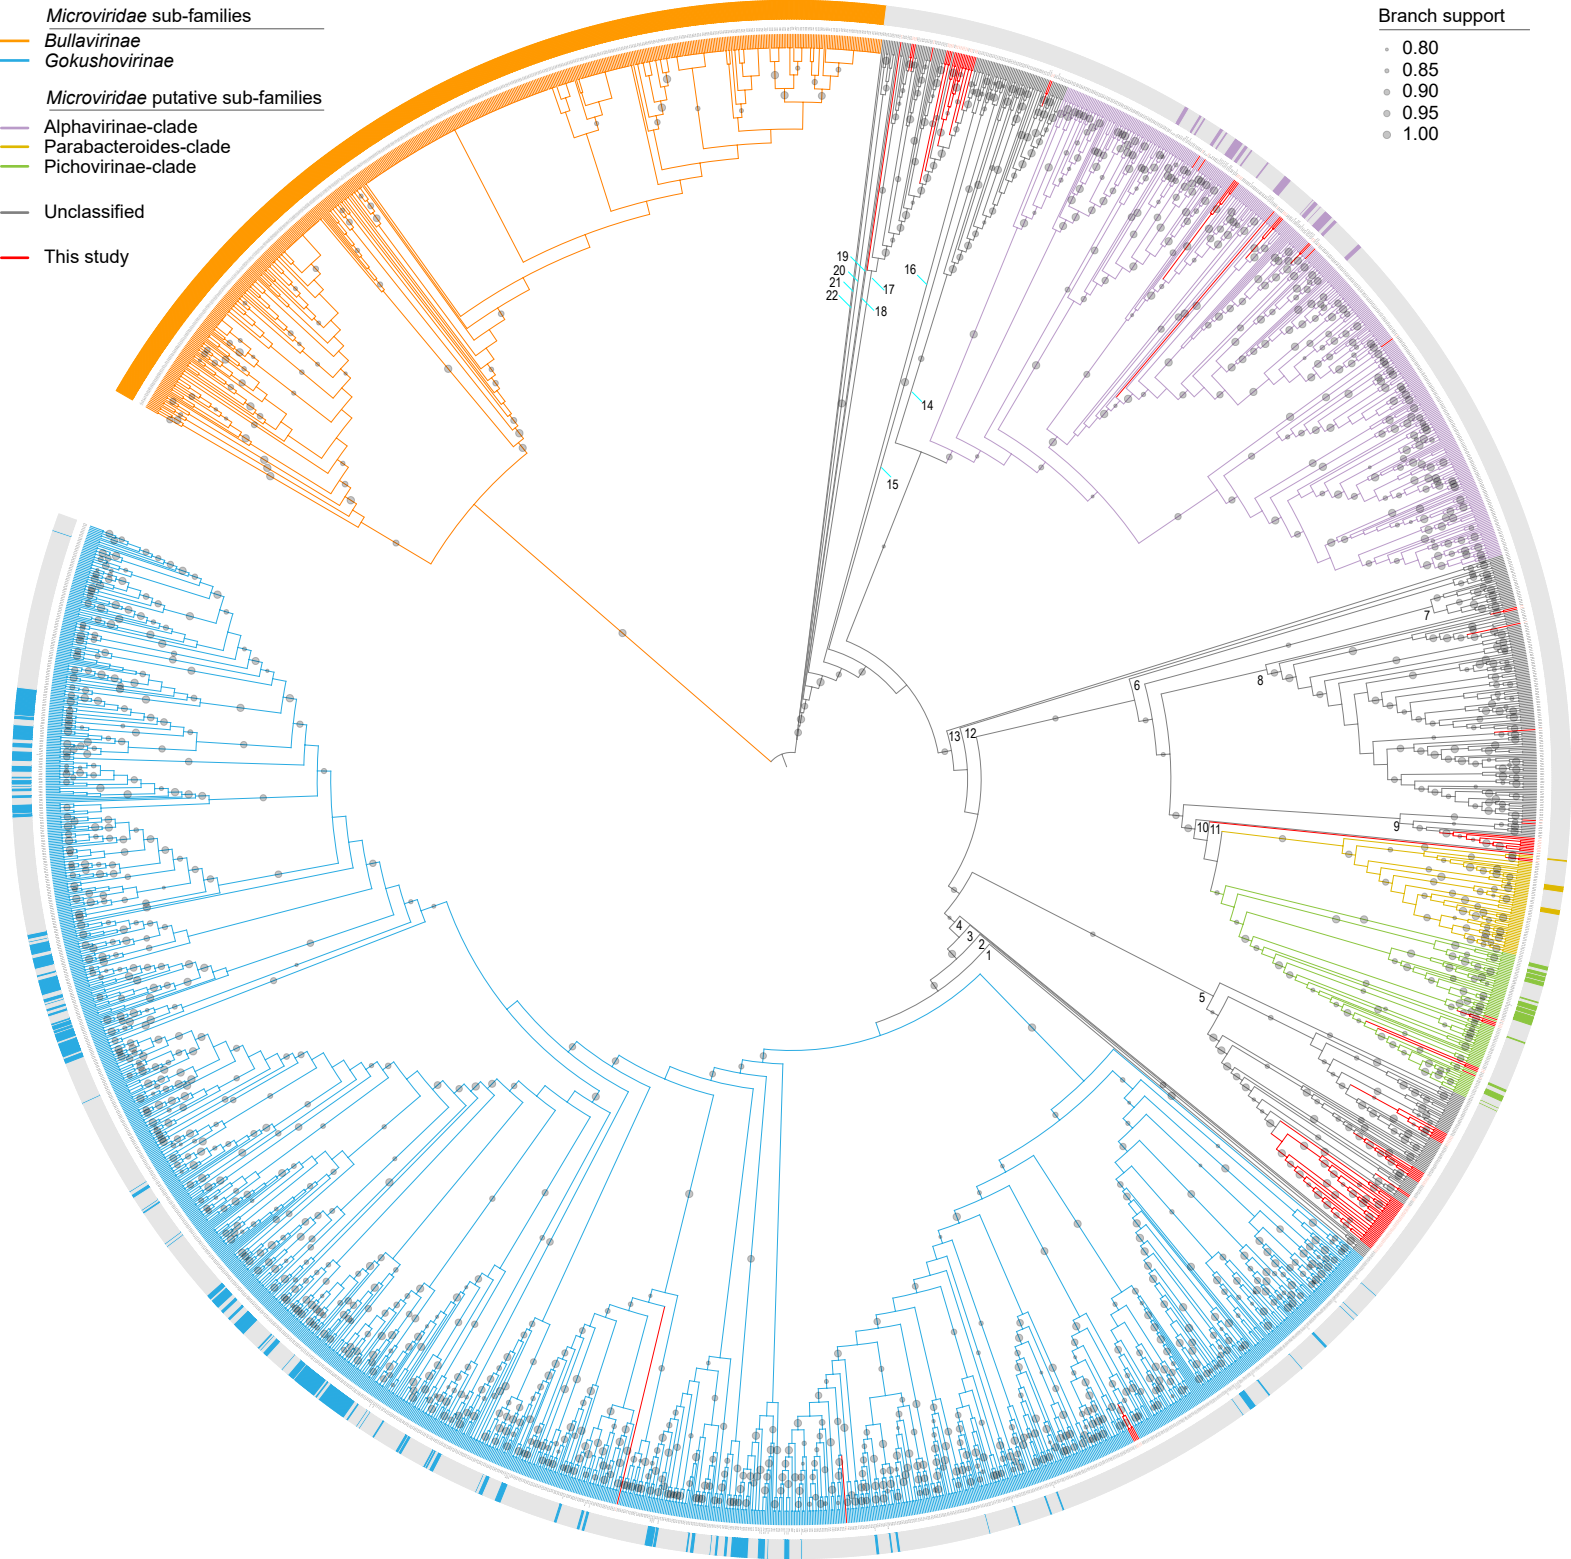

Supplement: s1 [file s1]

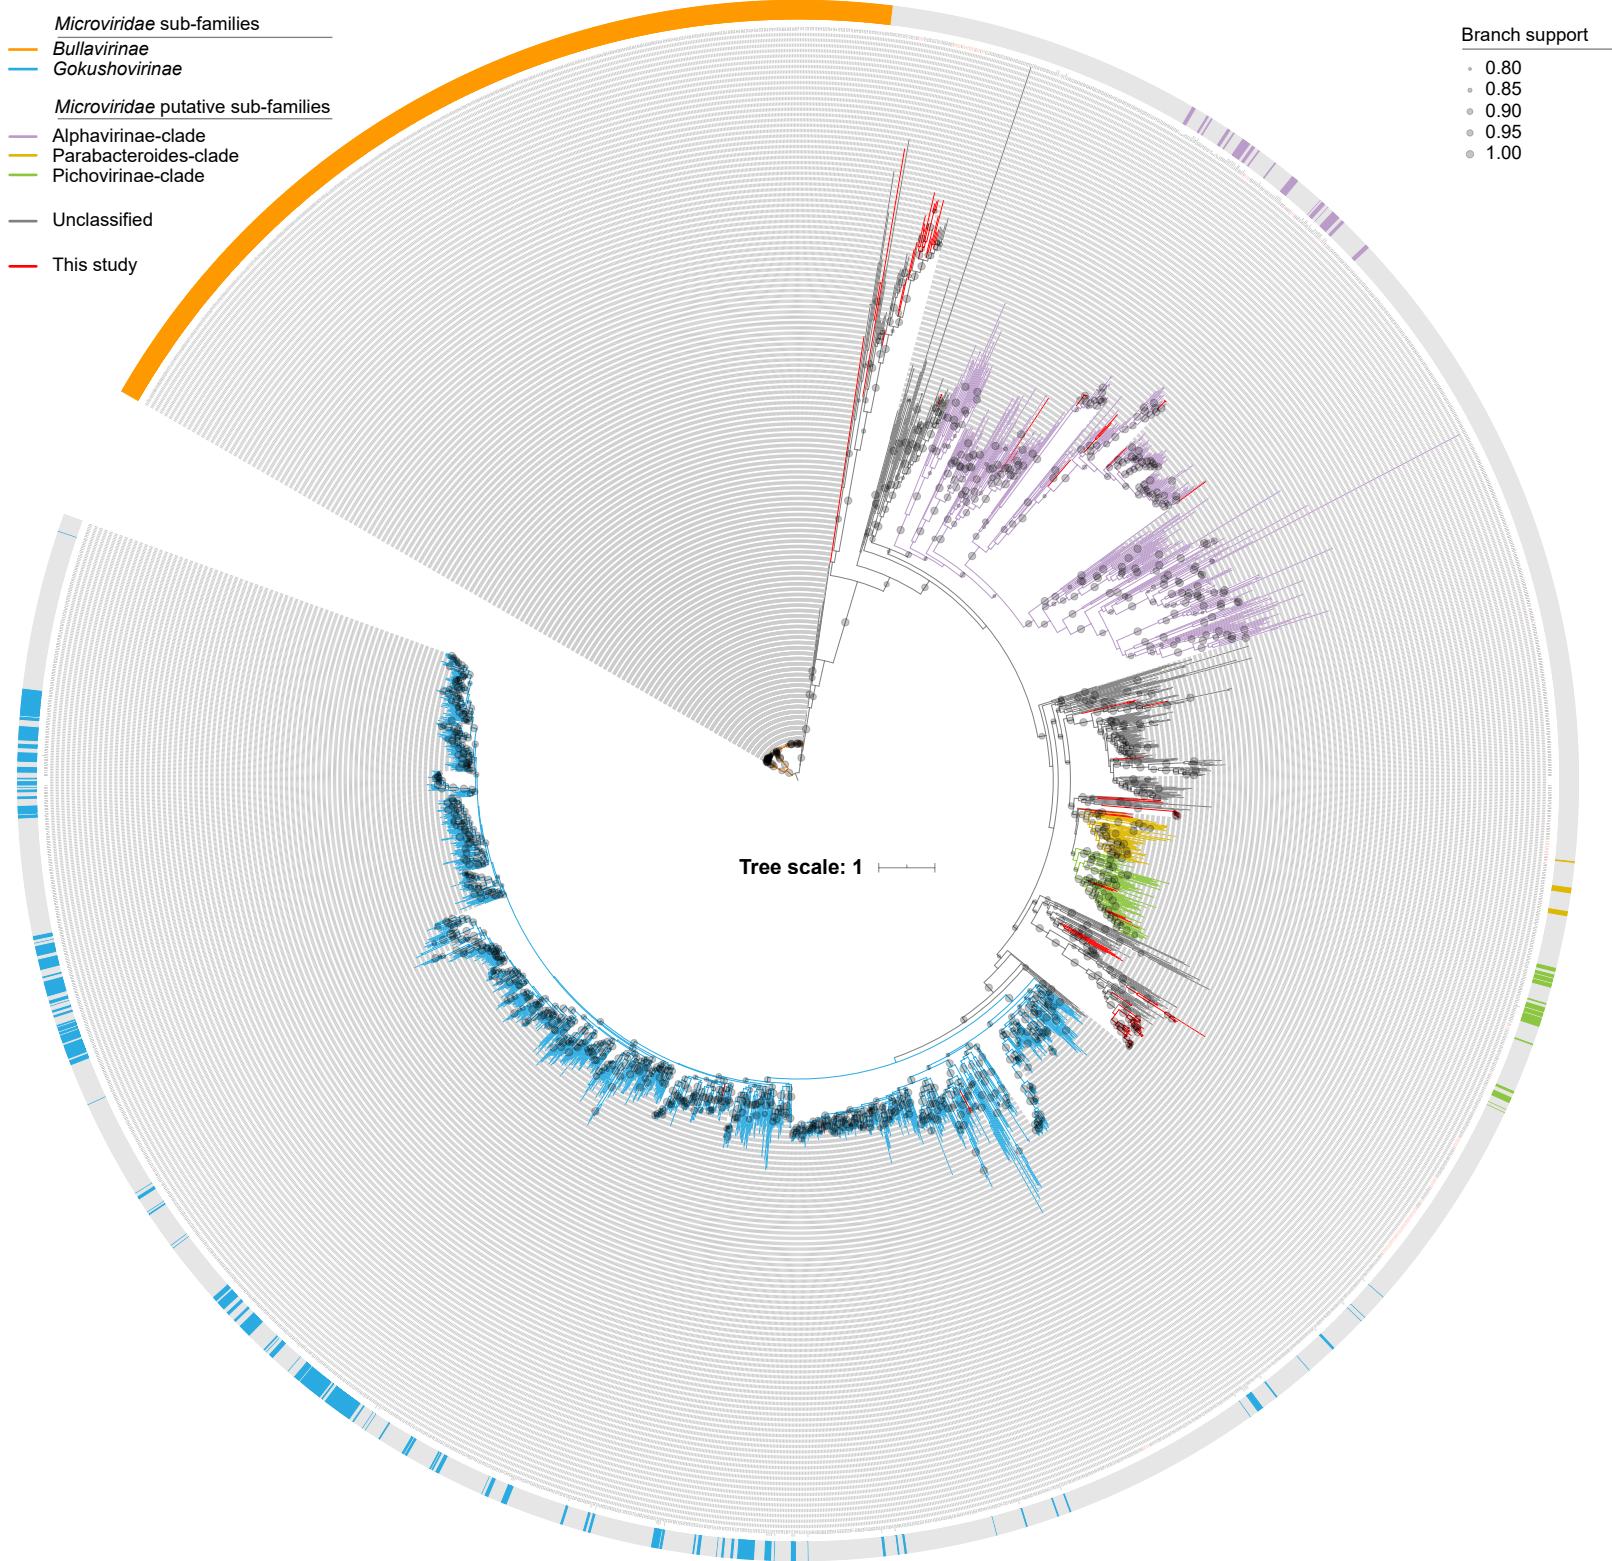

Supplement: s1 [file s1]
